# Supplementary material
Source: PubMed Central journal article supplement (PMC2706959)
Supplement: mmc1.pdf [file mmc1.pdf]

**Supplemental Data**

**Noncoding Mutations of *HGF* Are Associated**

**with Nonsyndromic Hearing Loss, DFNB39**

**Julie M. Schultz, Shaheen N. Khan, Zubair M. Ahmed, Saima Riazuddin, Ali Ahmed Waraya, Dhananjay Chhatre, Matthew F. Starost, Barbara Ploplis, Stephanie Buckley, David Velásquez, Madhulika Kabra, Kwanghyuk Lee, Muhammad J. Hassan, Ghazanfar Ali, Muhammad Ansar, Manju Ghosh, Edward R. Wilcox, Wasim Ahmad, Glenn Merlino, Suzanne M. Leal, Sheikh Riazuddin, Thomas B. Friedman, Robert J. Morell**





**Figure S1. Pedigrees of 36 Families Cosegregating Profound Deafness and c.482+1986\_1988delTGA within Intron 4 of *HGF***

Filled symbols represent individuals with prelingual, severe to profound, hearing loss. Asterisks indicate subjects enrolled in the protocol who contributed DNA samples. The pedigree for family DEM4011 was reported.<sup>16</sup> The exact relationship between families DEM4333A and DEM4333B was not determined at the time of family history interview.

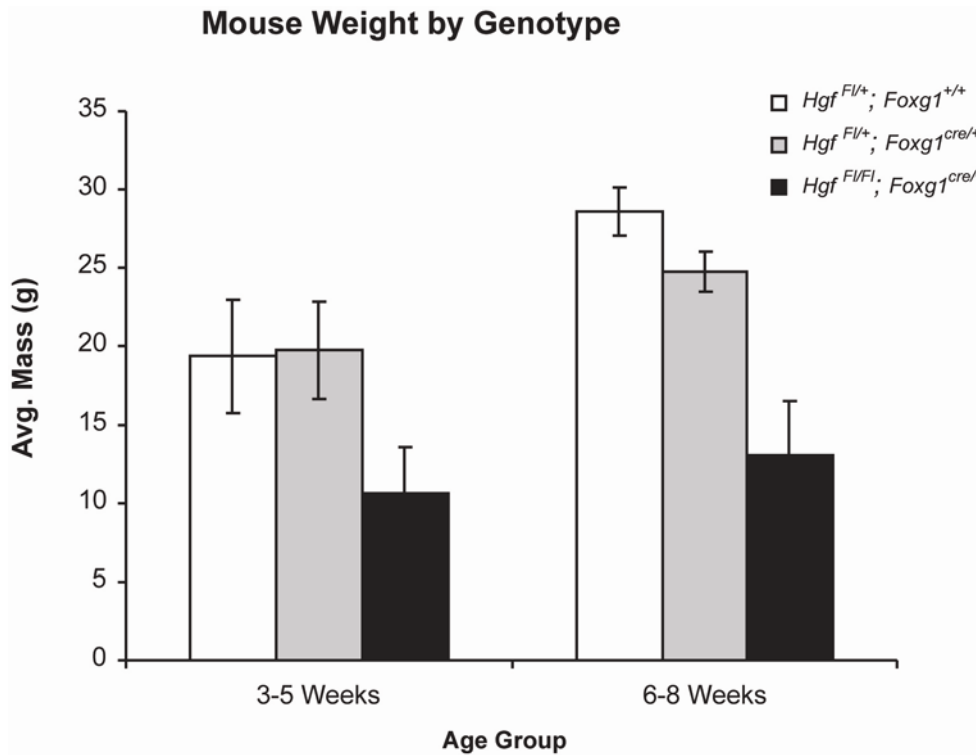

**Figure S2. Differences in Weights of *Hgf* Conditional Knockout Mice and Littermate Controls Weighed before ABR Testing**

Conditional knockout mice were significantly smaller than littermate controls. Vertical bars indicate standard deviations.

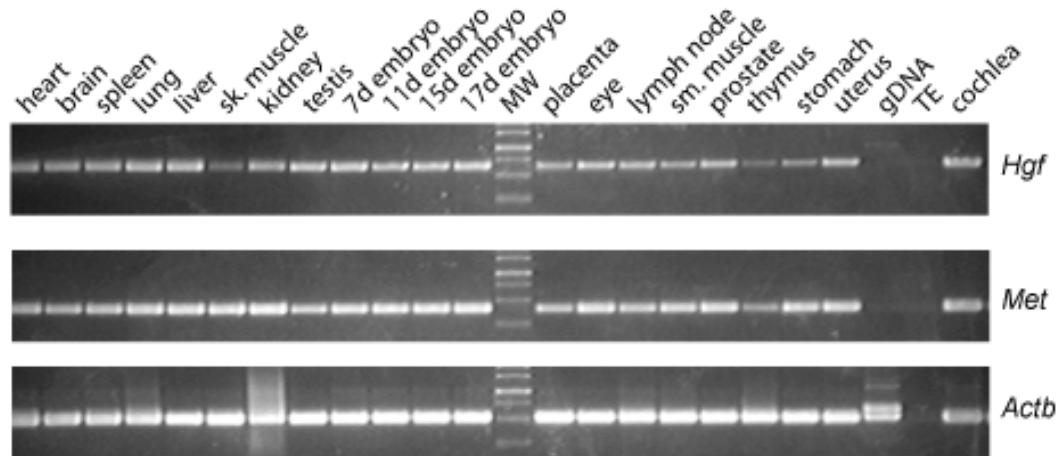

**Figure S3. RT-PCR of *Hgf* and *Met* from Mouse cDNAs**

Mouse MTC panels I and III (Clontech) and cDNA from mouse cochlea were amplified with PCR primers for *Hgf* (forward 5'-cgacaaggcttgatgataa-3', reverse 5'-aggcaataatccaaggaa-3'), *Met* (forward 5'-tgcaaggttgctgattcg-3', reverse 5'-ggacgtagtgtcccaatg-3') and *Actb* (forward 5'-agtgtgacgttgacatccgta-3', reverse 5'-gttgctccaaccaactgct-3'). Mouse genomic DNA and TE are included as controls. *Hgf* and *Met* are ubiquitously expressed in all mesenchymal and epithelial tissues, respectively.

**Table S1. Primer Sequences Used to Amplify and Sequence *HGF* Genomic DNA**

| Exon   | Forward Primer           | Reverse Primer          | Product (bp) <sup>a</sup> |
|--------|--------------------------|-------------------------|---------------------------|
| 1      | gttcagggatctgtttggt      | gaggggagttgagggaaagt    | 582                       |
| 2      | gctcctaaccctggaaatc      | ggtagcagttttgcgctct     | 508                       |
| 3      | tgcattgtttctatattgtcca   | gagggaggaagggaaatcaag   | 461                       |
| 4      | acagcgactgctctctgga      | aaacctgccgtaatacaattca  | 502                       |
| IVS4   | gatgtttatggccgagagga     | ggctttaagagagacaagtgagg | 500                       |
| 5      | tcagcaaattcacaggctca     | tagttgcattgcacgaaca     | 517                       |
| 6      | gcgctcgtggcctatagtaa     | ccctgctgatgattttgtgtt   | 669                       |
| 7      | actcgattggaacctcagc      | tccaaaaatgcaaagattgg    | 555                       |
| A (7b) | tgtgcagcatcacaaagtca     | gccctgtattcaaagaatgaaa  | 471                       |
| 8      | tgaatgaaaggaaaattggaatg  | ttgaggaccaaaccaga       | 558                       |
| 9      | aggccaatgtttgaaatgg      | caaaaccagtgagcaagaa     | 580                       |
| 10     | tctcgatcctctgacctcgt     | cttgagggttgaacaaaa      | 600                       |
| 11     | atctttgccatctgcttgc      | ttgggaataaatgccagacc    | 583                       |
| 12     | aagtagctgggtgtggtggt     | gcattgtgccccaaattaa     | 622                       |
| 13     | tgaggggtggtgagggattag    | gggtacaacctcaggacca     | 514                       |
| 14     | gtgtgttcgggatggctatt     | gcaaaatttccccaactga     | 598                       |
| 15     | tgctttacctgagcattttca    | atcagactgttgcccaatg     | 654                       |
| 16     | catttggacattcccacctt     | acctcacatggtctgatcc     | 518                       |
| 17     | tggatgcacaattctgaaa      | ggagtccggctctacacac     | 571                       |
| 18     | cagttgcagttattctcttttctg | ccaacatcagaaagcagcttag  | 640                       |

<sup>a</sup> All PCR products were amplified with 1.5 mM MgCl<sub>2</sub> and 57°C annealing temperature, except exons 5 and 8, where 2.5 mM MgCl<sub>2</sub> was used.

**Table S2. Control Chromosomes Screened for Mutations of *HGF***

| Mutation <sup>a</sup> | Pakistani | Indian | Coriell Human Diversity Panel | Coriell Caucasian Panel | Total  |
|-----------------------|-----------|--------|-------------------------------|-------------------------|--------|
| Δ3                    | 2/858     | 0/262  | 0/168                         | 0/400                   | 2/1688 |
| Δ10                   | 0/858     | 0/262  | 0/168                         | 0/400                   | 0/1688 |
| c.495G>A (p.S165S)    | 0/474     |        | 0/172                         | 0/394                   | 0/1040 |

<sup>a</sup> Δ3 = c.482+1986\_1988delTGA; Δ10 = c.482+1991\_2000delGATGATGAAA

Table S3. SNP Genotypes in 221,150 bp Surrounding *HGF* Mutations

|                      | rs4732399 | rs10231299 | rs5745752 | rs2286194 | B39 <sup>a</sup> | rs1558001 | rs969705 | rs12155338 |
|----------------------|-----------|------------|-----------|-----------|------------------|-----------|----------|------------|
| ~Mb <sup>b</sup>     | 81.12     | 81.12      | 81.17     | 81.19     | 81.22            | 81.25     | 81.26    | 81.34      |
| PKDF002              | CC        | TT         | GG        | AA        | Δ3               | GG        | CC       | TT         |
| PKDF084              | CC        | TT         | GG        | AA        | Δ3               | GG        | CC       | TT         |
| PKDF121              | CC        | TT         | GG        | AA        | Δ3               | GG        | CC       | TT         |
| PKDF157              | CC        | TT         | GG        | AA        | Δ3               | GG        | CC       | TT         |
| PKDF204              | TT        | CC         | GG        | AA        | Δ3               | GG        | CC       | TT         |
| PKDF239 <sup>c</sup> | CC        | TT         | GG        | AA        | Δ3               | GG        | CC       | TT         |
| PKDF351 <sup>c</sup> | CC        | TT         | GG        | AA        | Δ3               | GG        | CC       | TT         |
| PKDF352              | CC        | TT         | GG        | AA        | Δ3               | GG        | CC       | TT         |
| PKDF402              | CC        | TT         | GG        | AA        | Δ3               | GG        | TT       | AA         |
| PKDF711              | CC        | TT         | GG        | AA        | Δ3               | GG        | CC       | TT         |
| PKDF841              | CC        | TT         | GG        | AA        | Δ3               | GG        | CC       | AA         |
| PKDF847              | CC        | TT         | GG        | AA        | Δ3               | GG        | CC       | AA         |
| PKDF879              | CC        | TT         | GG        | AA        | Δ3               | GG        | CC       | TT         |
| PKDF1113             | CC        | TT         | GG        | AA        | Δ3               | GG        | CC       | TT         |
| PKSR36a              | CC        | TT         | GG        | AA        | Δ3               | GG        | CC       | TT         |
| PKSR53a              | CC        | TT         | GG        | AA        | Δ3               | GG        | CC       | TT         |
| PKSR2b               | CC        | TT         | GG        | AA        | Δ3               | GG        | CC       | TT         |
| IDM13                | CC        | TT         | GG        | AA        | Δ3               | GG        | CC       | TT         |
| Kla2                 | CC        | TT         | GG        | AA        | Δ3               | GG        | CC       | TT         |
| DEM4011              | CC        | TT         | GG        | AA        | Δ3               | GG        | CC       | TT         |
| DEM4017A             | CC        | TT         | GG        | AA        | Δ3               | GG        | CC       | TT         |
| DEM4018              | CC        | TT         | GG        | AA        | Δ3               | GG        | CC       | AA         |
| DEM4048              | CC        | TT         | GG        | AA        | Δ3               | GG        | CC       | TT         |
| DEM4050              | CC        | CC         | GG        | AA        | Δ3               | GG        | CC       | TT         |
| DEM4058              | CC        | TT         | GG        | AA        | Δ3               | GG        | CC       | TT         |
| DEM4071              | CC        | TT         | GG        | AA        | Δ3               | GG        | CC       | TT         |
| DEM4142              | CC        | TT         | GG        | AA        | Δ3               | GG        | CC       | TT         |
| DEM4174              | CC        | TT         | GG        | AA        | Δ3               | GG        | CC       | TT         |
| DEM4199              | CC        | CC         | GG        | AA        | Δ3               | GG        | CC       | TT         |
| DEM4201              | CC        | TT         | GG        | AA        | Δ3               | GG        | CC       | TT         |
| DEM4212              | CC        | TT         | GG        | AA        | Δ3               | GG        | CC       | TT         |
| DEM4320              | CC        | TT         | GG        | AA        | Δ3               | GG        | CC       | TT         |
| DEM4332              | CC        | TT         | GG        | AA        | Δ3               | GG        | CC       | TT         |
| DEM4333<br>(A,B)     | CC        | TT         | GG        | AA        | Δ3               | GG        | CC       | TT         |
| PKDF601              | CC        | TT         | AA        | AA        | Δ10              | AA        | TT       | TT         |
| PKDF210              | CC        | CC         | GG        | TT        | G>A              | GG        | CC       | AA         |

<sup>a</sup> *HGF* mutations: Δ3=c.482+1986\_1988delTGA; Δ10=c.482+1991\_2000delGATGATGAAA; G>A=c.495G>A (p.S165S)

<sup>b</sup> Nucleotide location in megabases according to human genome reference sequence (NCBI build 36.1)

<sup>c</sup> Pedigrees that define the proximal and distal breakpoints for the minimal *DFNB39* interval
